# Supplementary material
Source: PubMed Central journal article supplement (PMC3683388)

## Supporting Information

### **Comparative Study of Chromatographic Medium-Associated Mass and Potential Antitumor Activity Loss with Bioactive Extracts**

Sandipan Datta<sup>†</sup>, Yu-Dong Zhou<sup>†,\*</sup>, and Dale G. Nagle<sup>†,§,\*</sup>

Department of Pharmacognosy and Research Institute of Pharmaceutical Sciences, School of Pharmacy, University of Mississippi, University, MS 38677, United States

#### **Table of Contents**

**Figure S1. TLC analysis of the crude extracts and fractions exposed to elution with chromatographic media.**

**Figure S2. Inhibition of HIF-1 activation [hypoxia (1% O<sub>2</sub>)-induced and 1,10-phenanthroline (1,10-phen)-induced] by extracts.**

**Figure S3. Inhibition of 1,10-phenanthroline-induced HIF-1 activation by recombined fractions obtained by passing *Citrus reticulata* extract over various media.**

**Figure S4. HPLC analysis report of *Curcuma longa* powder EtOH extract (McCormick).**

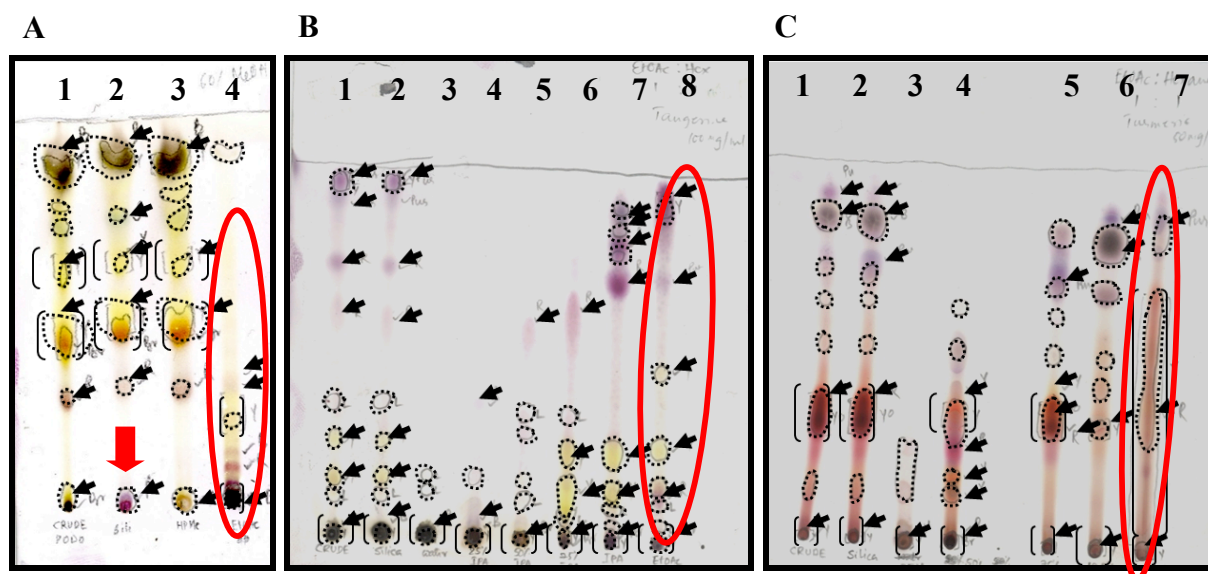

**Figure S1. TLC analysis of the crude extracts and fractions exposed to elution with chromatographic media.**

**(A)** TLC analysis of the *Podophyllum peltatum* crude extract exposed to elution with various chromatographic media. Notable chemical alterations in (Red arrow) and active phytochemicals retained in EtOAc eluent (solid circle); **1** – Crude *Po. peltatum* extract, **2** – Combined *Po. peltatum* fractions from a Si gel column, **3** – Combined water-MeOH fractions of *Po. peltatum* from a HP20SS column and **4** – EtOAc wash of *Po. peltatum* from a HP20SS columns after water-MeOH elution.  $C_{18}$  reversed-phase TLC eluted with 60% MeOH in water;

**(B)** TLC analysis of the *Citrus reticulata* crude extract and fractions exposed to elution with various chromatographic media. **1** – Crude *Ci. reticulata* extract, **2** – Combined *Ci. reticulata* fractions from a Si gel column, **3** – Water fraction of *Ci. reticulata* extract from a HP20SS column, **4** – Isopropanol-water (1:3) fraction of *Ci. reticulata* extract from a HP20SS column, **5** – Isopropanol-water (1:1) fraction of *Ci. reticulata* extract from a HP20SS column, **6** – Isopropanol-water fraction (3:1) of *Ci. reticulata* extract from a HP20SS column, **7** – Isopropanol fraction of *Ci. reticulata* extract from a HP20SS column and **8** – EtOAc wash after isopropanol-water elution of *Ci. reticulata* extract from a HP20SS column; active phytochemicals retained in EtOAc eluent (solid circle); Si gel normal phase TLC eluted with hexanes:EtOAc (1:1);

**(C)** TLC analysis of the *Curcuma longa* crude extract and fractions exposed to elution with various chromatographic media. **1** – Crude *Cu. longa* extract, **2** – Combined *Cu. longa* fractions from a Si gel column, **3** – Isopropanol-water (1:3) fraction of *Cu. longa* extract from a HP20SS column, **4** – Isopropanol-water (1:1) fraction of *Cu. longa* extract from a HP20SS column, **5** – Isopropanol-water (3:1) fraction of *Cu. longa* extract from a HP20SS column, **6** – Isopropanol fraction of *Cu. longa* extract and **7** – EtOAc wash of *Cu. longa* extract from a HP20SS column after isopropanol-water elution; active phytochemicals retained in EtOAc eluent (solid circle); Si gel normal-phased TLC eluted with hexanes:EtOAc (1:1).

Pigments = “bracketed” spots,  $UV_{254}$ -absorbing compounds = “dotted circles” and 10% ethanolic sulfuric acid-charred compounds = “arrows”.

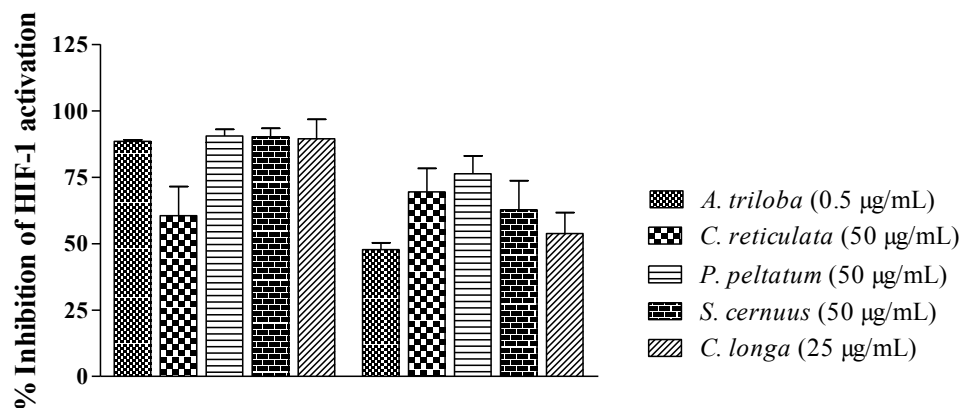

**Figure S2. Inhibition of HIF-1 activation [hypoxia (1% O<sub>2</sub>)-induced and 1,10-phenanthroline (1,10-phen)-induced] by extracts.** Data shown are average + standard deviation ( $n = 3$ ).

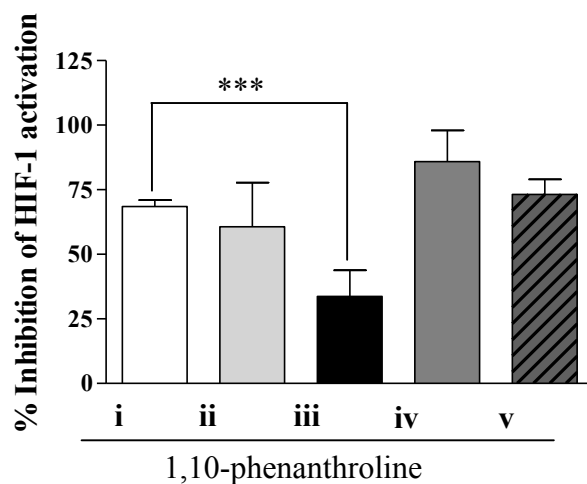

**Figure S3. Inhibition of 1,10-phenanthroline-induced HIF-1 activation by recombined fractions obtained by passing *Citrus reticulata* extract over various media.** [1 – Control, 2 – HP20SS, 3 – Si Gel, 4 – Diol, 5 – Sephadex LH-20]. Identical volumes of the stock solutions used to load the columns were placed in vials and dried ( $n = 3$ ). The HIF-1 inhibitory activity of the dried materials served as controls. Data represent average + standard deviation ( $n = 3$ ). Data was analyzed by one-way ANOVA with Bonferroni post hoc test; Differences between data sets were considered statistically significant when  $p < 0.05$  (\*\*\*)  $p < 0.001$ ).

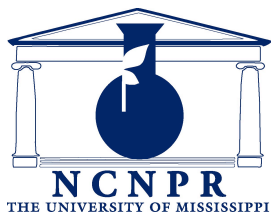

# ANALYSIS REPORT

## ANALYSIS REPORT

Figure S4. HPLC analysis report of *Curcuma longa* powder (McCormick).

**Sample Name:** Nagle/Tumeric (01/2013)

**Assay Method:** UHPLC-UV

**Date of Analysis:** January 24, 2013

**Date of Report:** January 24, 2013

**Compounds Used For UHPLC Chemical Analysis:**

- (1) Curcumin
- (2) Desmethoxycurcumin
- (3) Bisdesmethoxycurcumin
- (4) Ar-turmerone

**Results:**

| Sample Name             | Sample Weight (mg) | Amount (% , mg/100 mg sample weight) |                    |                       |              |
|-------------------------|--------------------|--------------------------------------|--------------------|-----------------------|--------------|
|                         |                    | Curcumin                             | Desmethoxycurcumin | Bisdesmethoxycurcumin | Ar-turmerone |
| Nagle/Tumeric (01/2013) | 15.1               | 18.8                                 | 5.3                | 7.2                   | 9.5          |

**Reference:** Bharathi Avula, Yan-Hong Wang and Ikhlas A. Khan, Quantitative Determination of Curcuminoids from the Roots of *Curcuma longa*, *Curcuma* species and Dietary Supplements Using an UPLC-UV-MS Method, *J. Chromatograph. Separat. Techniq.* 2012, 3:120. (doi:10.4172/2157-7064.1000120).

**Analyzed By:** Dr. Yan-Hong Wang

**Reviewed & Approved By:** Dr. Ikhlas A. Khan

**Disclaimer of Warranties:** The compound/extract or analysis is being supplied to the receiver for experimental use only and is provided "AS IS" with no warranties of any kind, express or implied, including any warranty of merchantability or fitness for a particular purpose. Company shall not directly or indirectly use the University name, or the name of any trustee, officer or employee thereof, without prior written consent.

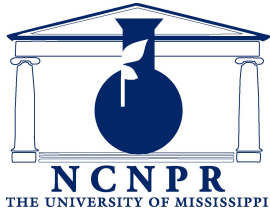

# ANALYSIS REPORT

## ANALYSIS REPORT

### HPLC Chromatograms

#### UHPLC-UV analysis at 240 nm

**Mixture of Standards [curcumin (1), desmethoxycurcumin (2), bisdesmethoxycurcumin (3) and ar-turmerone (4)]**

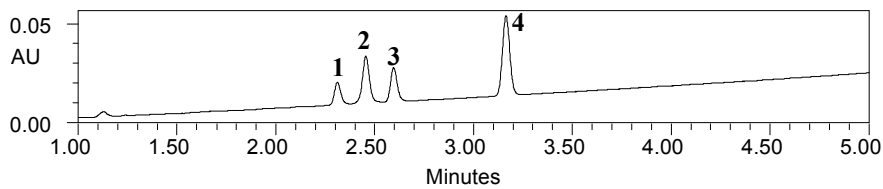

#### ***Curcuma longa* (MPG-A104)**

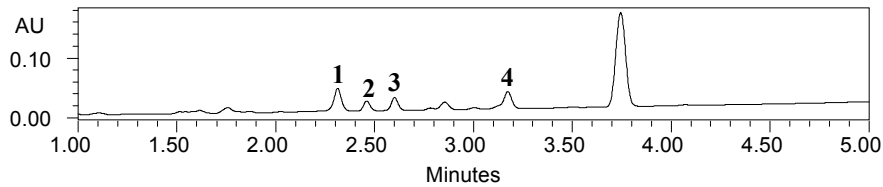

#### **Nagle/Tumeric (01/2013)**

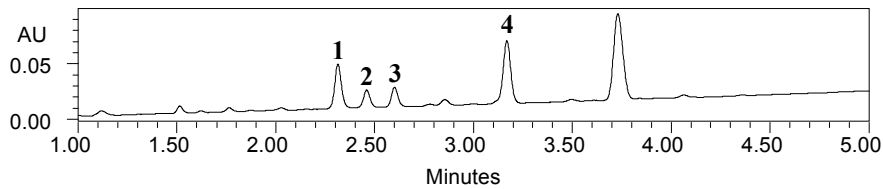

Supplement: NIHMS449870-supplement-1_si_001.pdf [file NIHMS449870-supplement-1_si_001.pdf]
